# Supplementary material
Source: PubMed Central journal article supplement (PMC3783607)

## REVISED

# **The Metal-Drug Synergy: New Ruthenium<sup>II</sup> Complexes of Ketoconazole are Highly Active against *Leishmania major* and *Trypanosoma cruzi* and Non-toxic to Human or Murine Normal Cells**

Eva Iniguez,<sup>†</sup> Antonio Sánchez,<sup>§</sup> Miguel A. Vasquez,<sup>†</sup> Alberto Martínez,<sup>‡</sup> Joanna Olivas,<sup>†</sup> Aaron Sattler,<sup>¶</sup> Roberto A. Sánchez-Delgado,<sup>§,✉</sup> and Rosa A. Maldonado<sup>†, ✉</sup>

## SUPPLEMENTARY INFORMATION

1. 1D and 2D NMR spectra of complexes **1-6**
2. UV-vis spectra of aqueous solutions of complex **3** after 5 min and after 24 h

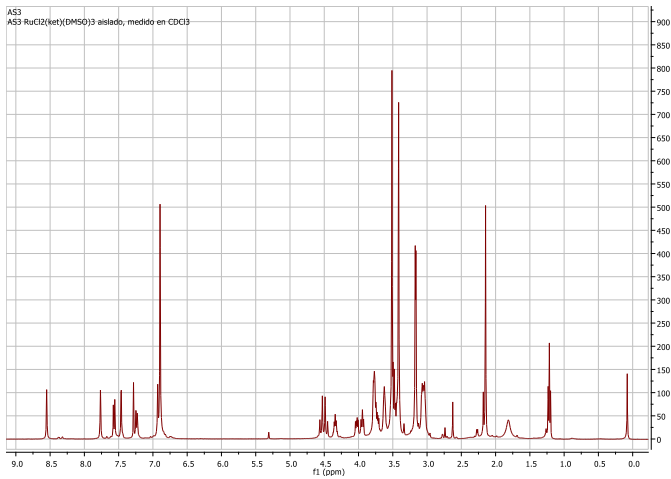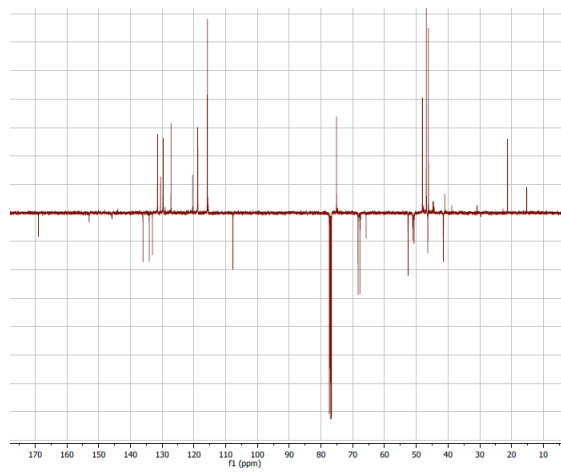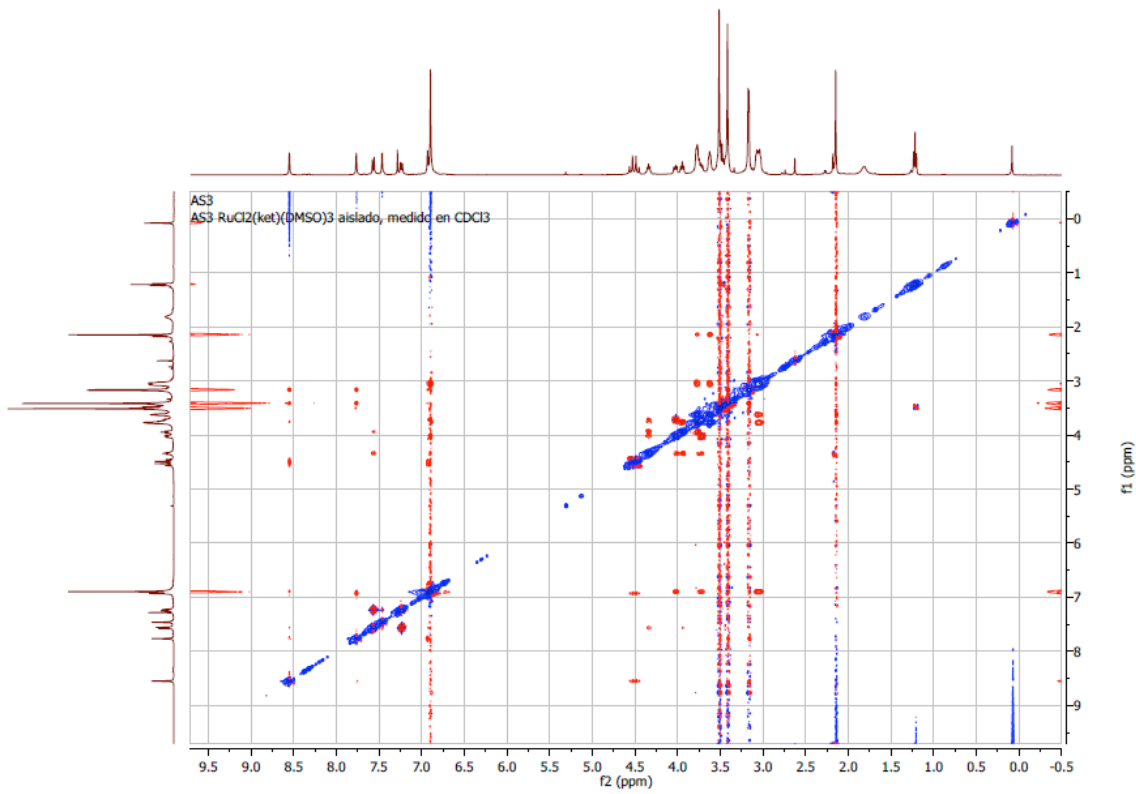

# Complex 2 $^1\text{H}$ , $^{13}\text{C}$ , $^1\text{H}$ COSY and $^1\text{H}$ - $^{13}\text{C}$ HSQC

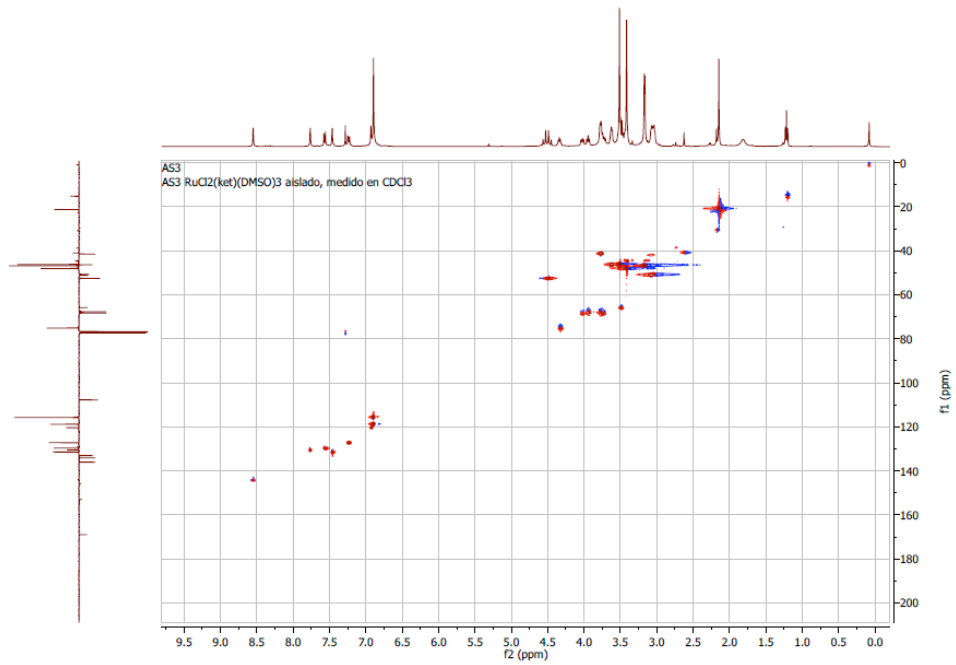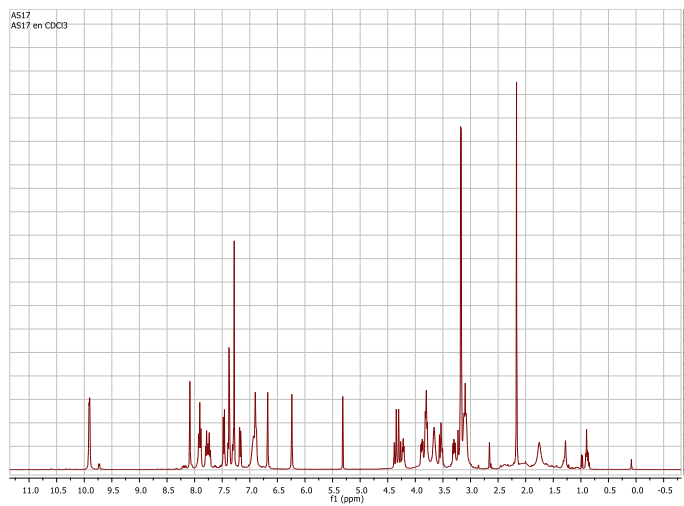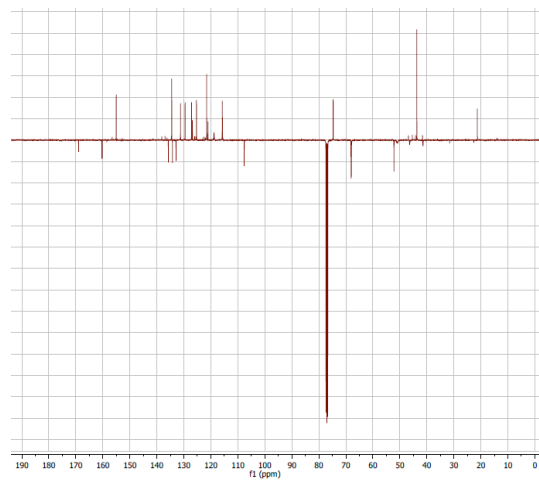

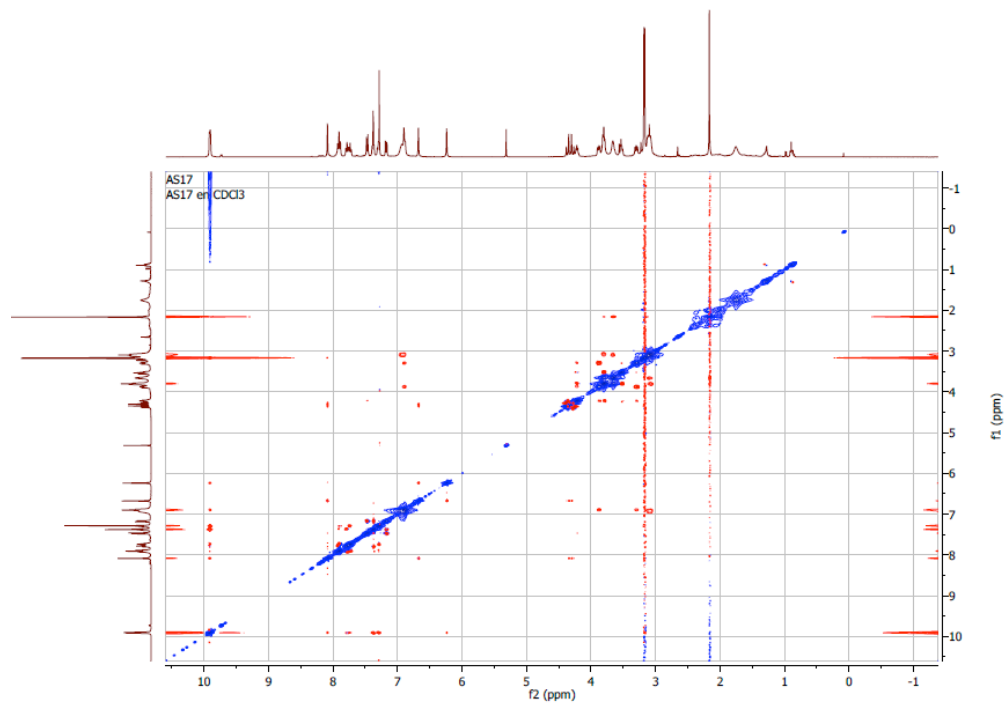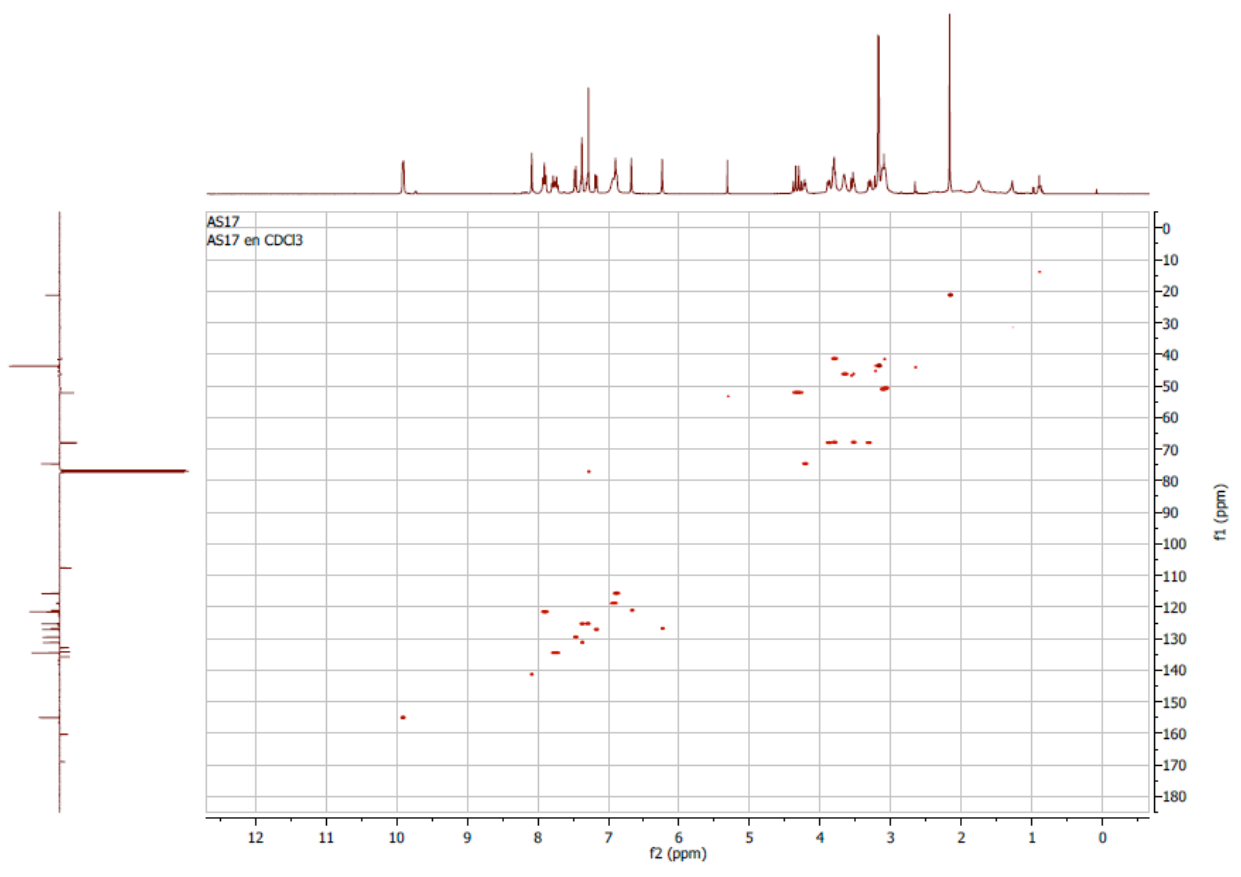

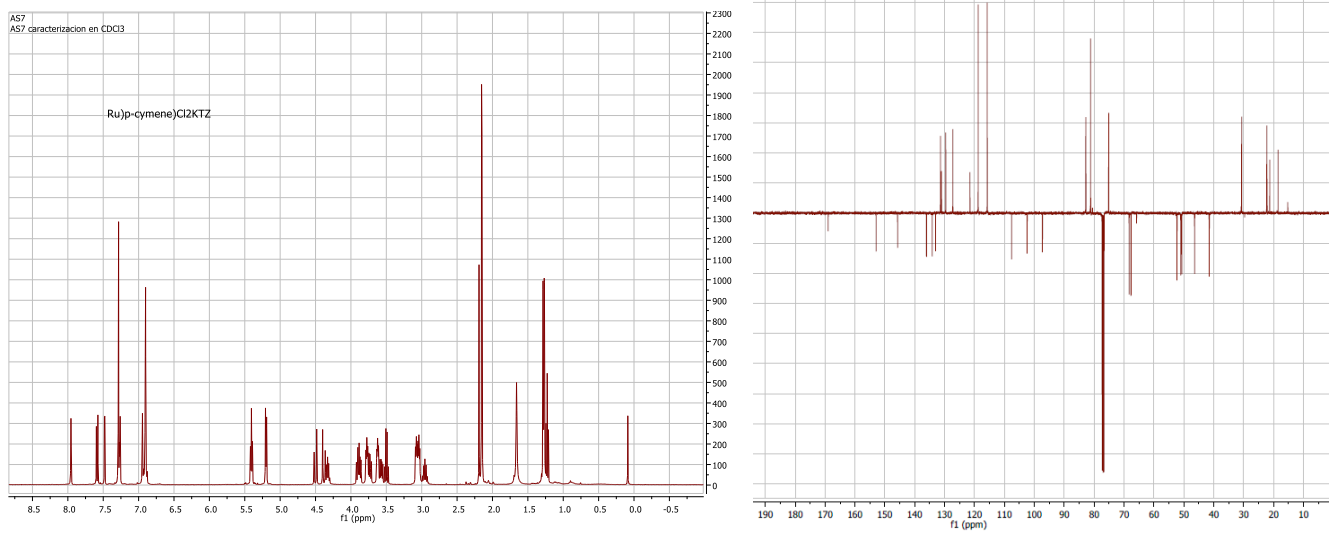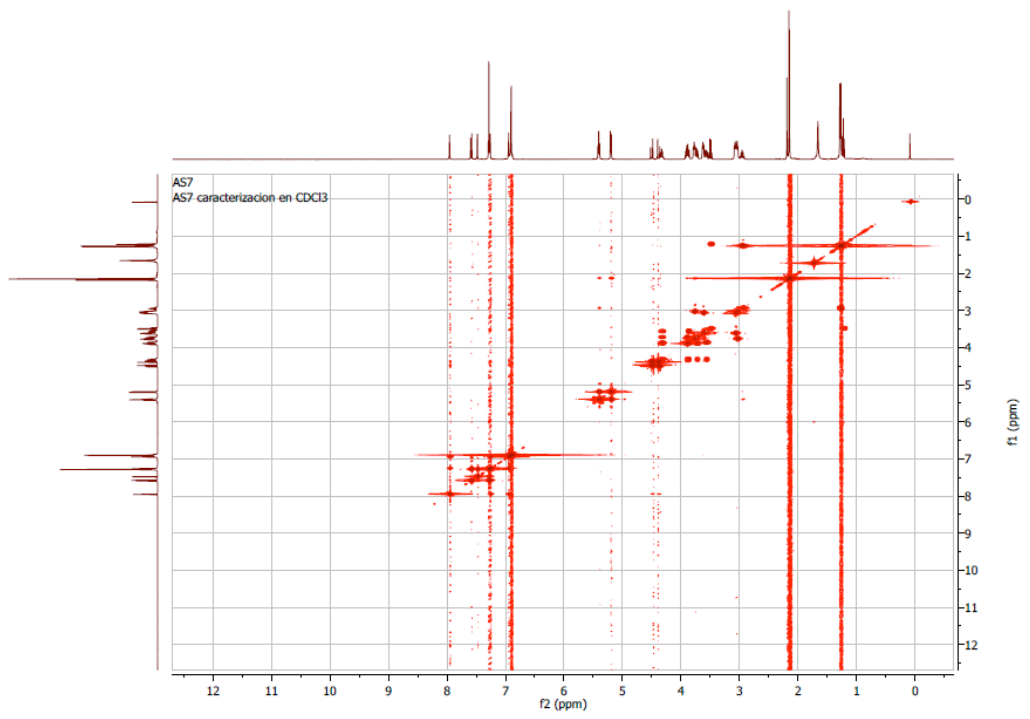

Complex 4  $^1\text{H}$ ,  $^{13}\text{C}$ ,  $^1\text{H}$  COSY and  $^1\text{H}$ - $^{13}\text{C}$  HSQC

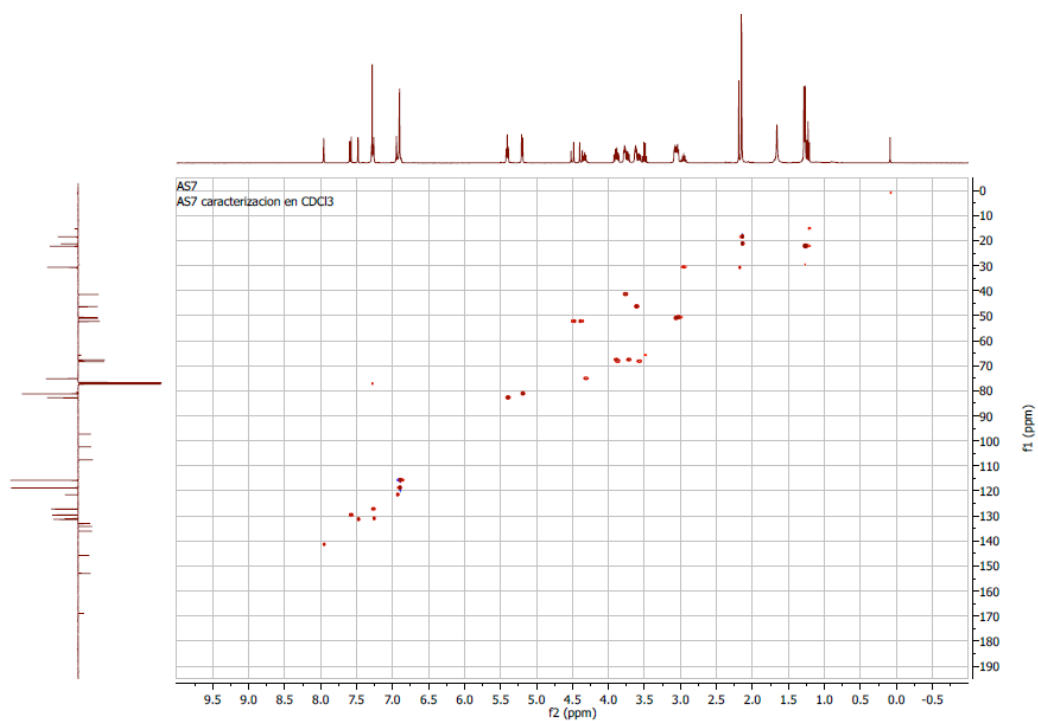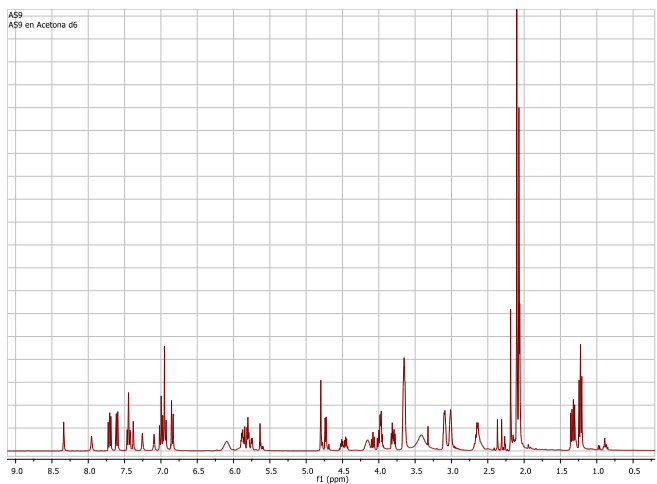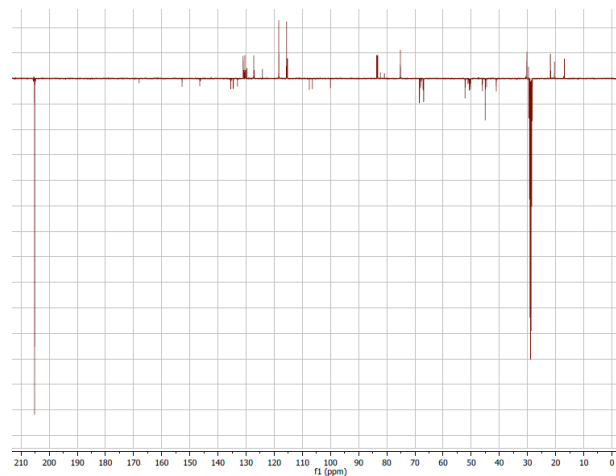

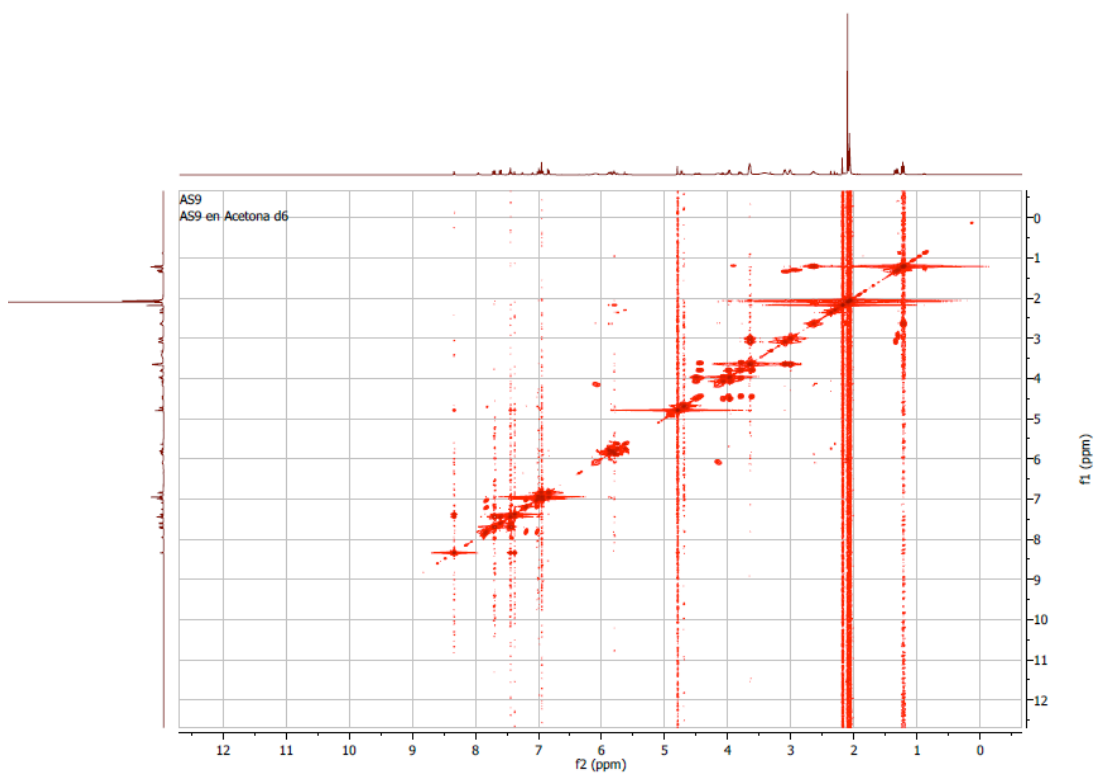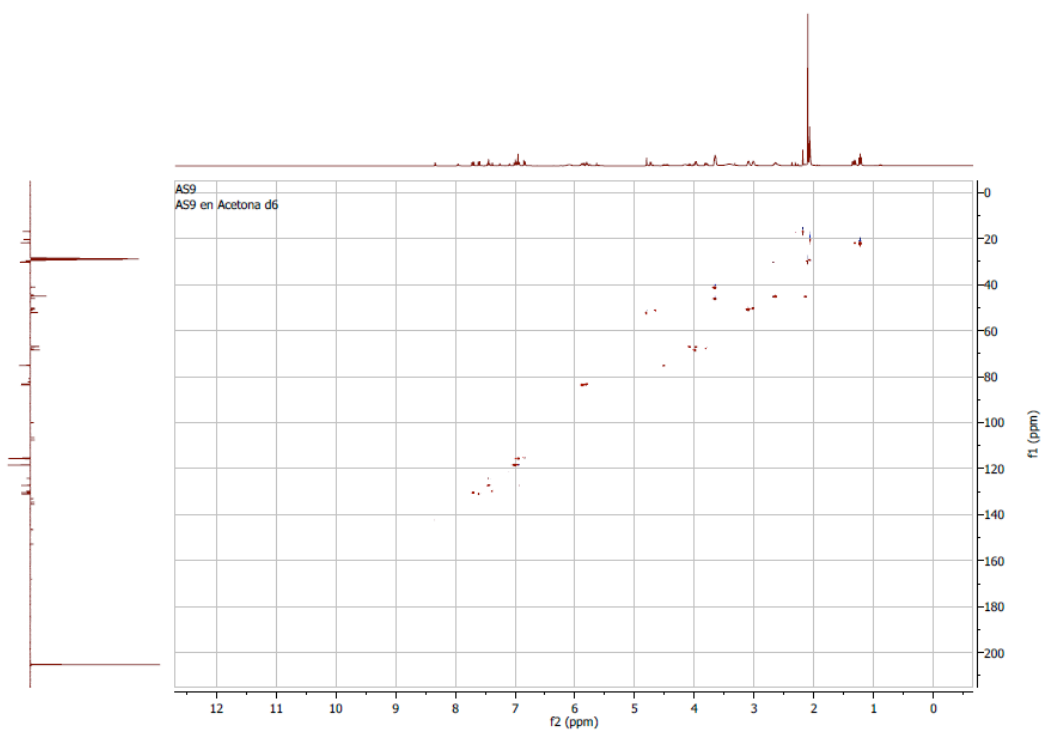

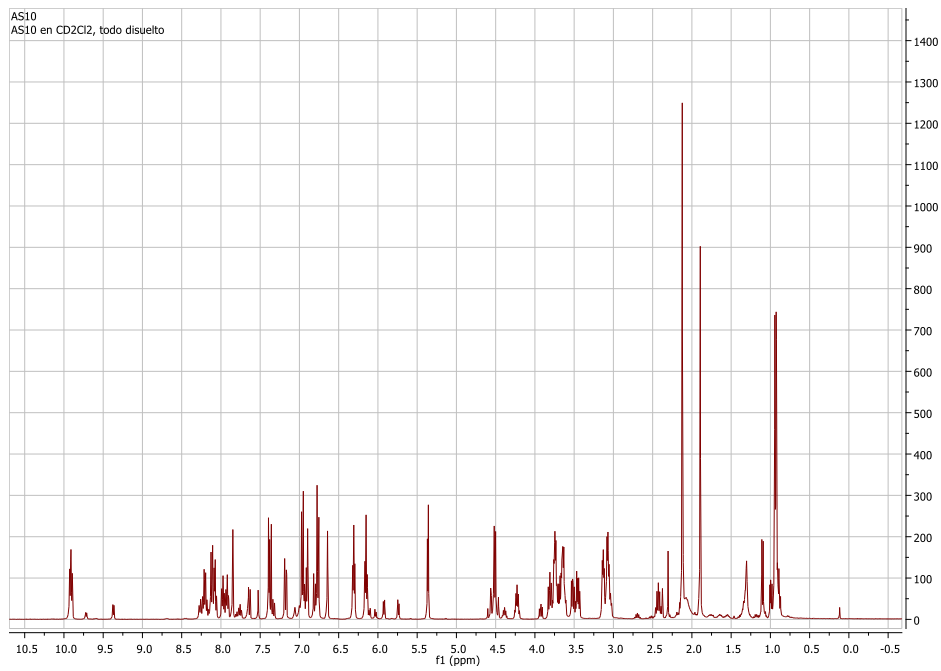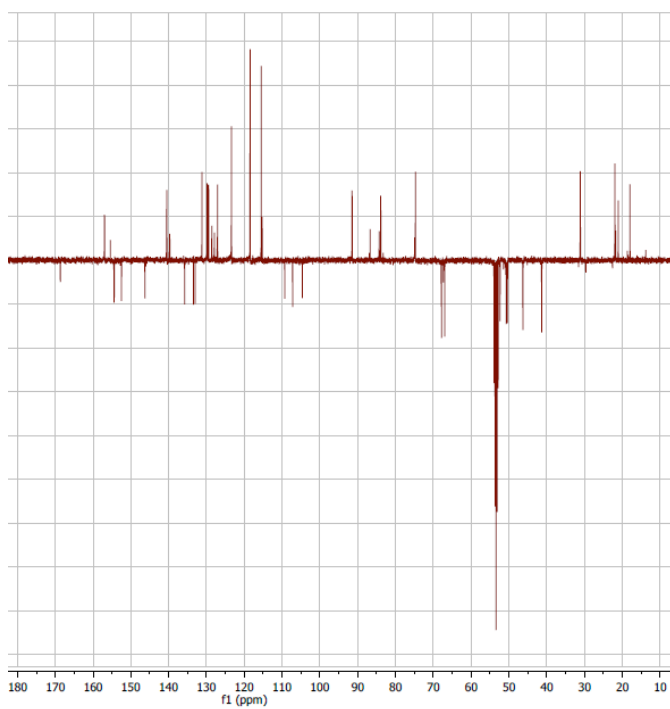



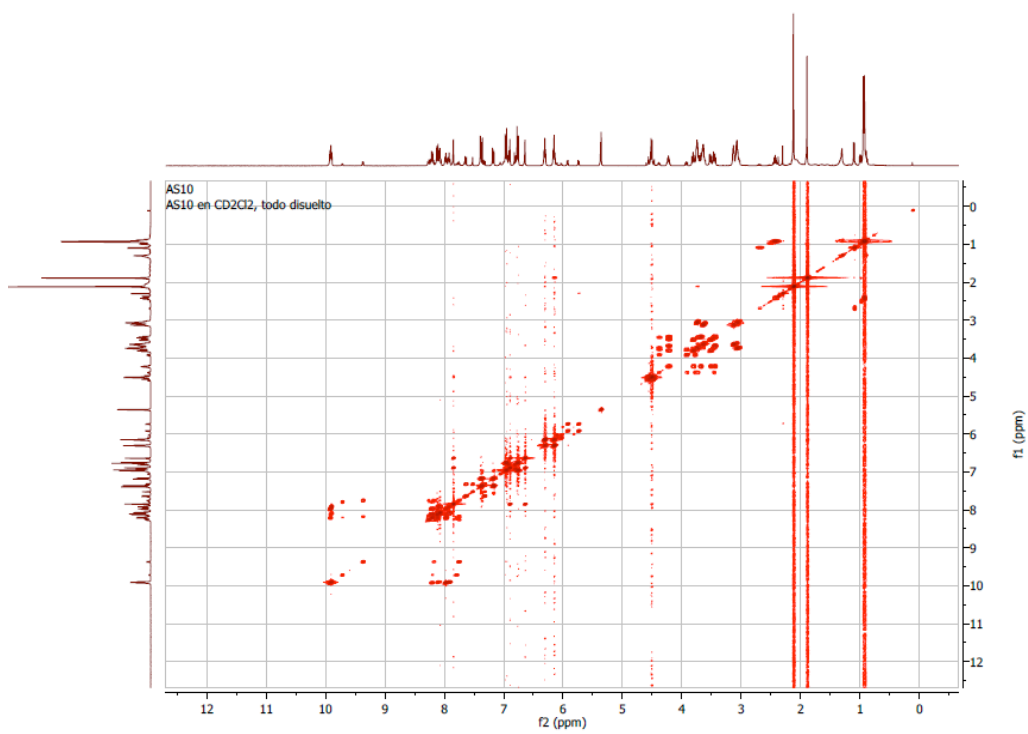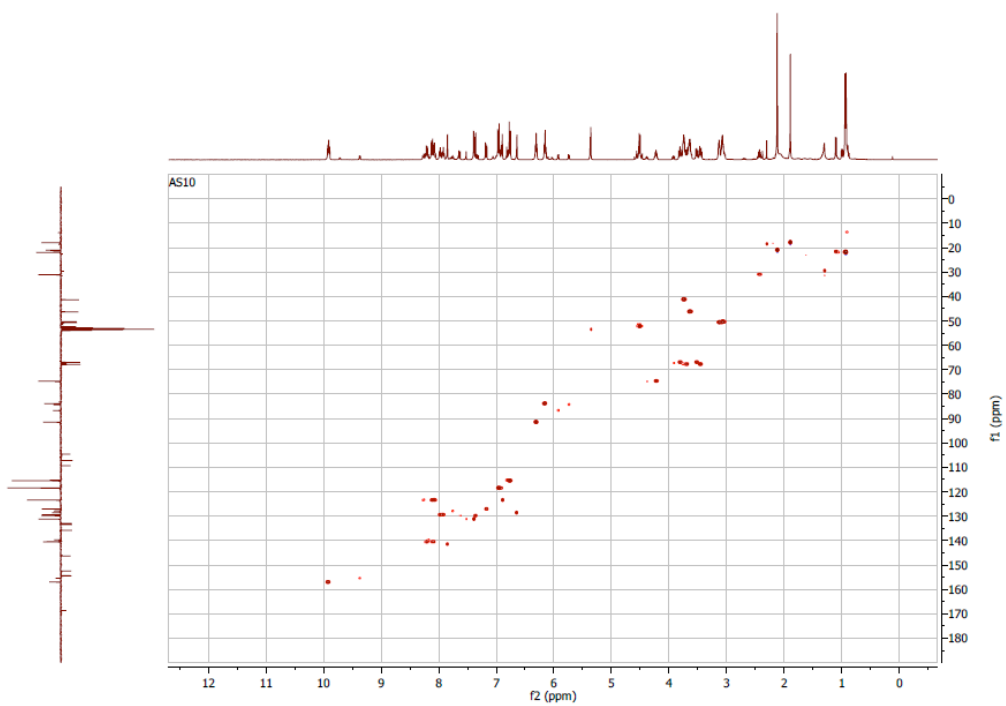

Complex 3. UV-Visible H<sub>2</sub>O/DMSO 90%:10%

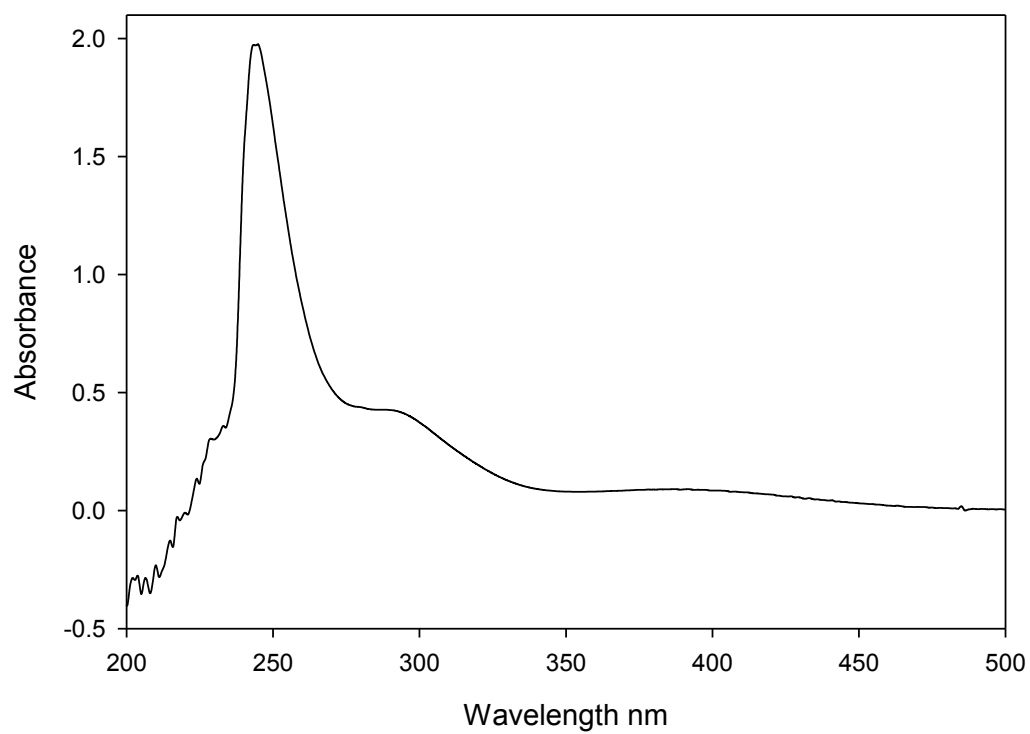

Supplement: NIHMS505883-supplement-01.pdf [file NIHMS505883-supplement-01.pdf]
